# Supplementary material for: Using fluorescent dissolved organic matter to trace and distinguish the origin of Arctic surface waters
Source: PubMed Central journal article supplement (PMC5035922; doi:10.1038/srep33978), 2016-09-26

## - SUPPLEMENTARY INFORMATION -

### Using fluorescent dissolved organic matter to trace and distinguish the origin of Arctic surface waters

Rafael **Gonçalves-Araujo**<sup>1,2,3\*</sup>, Mats A. **Granskog**<sup>4</sup>, Astrid **Bracher**<sup>1,5</sup>,  
Kumiko **Azetsu-Scott**<sup>6</sup>, Paul A. **Dodd**<sup>4</sup>, and Colin A. **Stedmon**<sup>3\*\*</sup>

<sup>1</sup>Alfred Wegener Institute Helmholtz Centre for Polar and Marine Research (AWI), Climate Sciences Division, Physical Oceanography of Polar Seas, Bussestraße 24, 27570 Bremerhaven, Germany

<sup>2</sup>University of Bremen, Faculty of Biology and Chemistry (FB2) - PO Box 330440, 28334 Bremen, Germany

<sup>3</sup>Technical University of Denmark, National Institute for Aquatic Resources, Section for Marine Ecology and Oceanography, Kavalergården 6, 2920 Charlottenlund, Denmark

<sup>4</sup>Norwegian Polar Institute, Fram Centre, Postbox 6606 Langnes, 9296 Tromsø, Norway

<sup>5</sup>University of Bremen, Institute of Environmental Physics, PO Box 330440, 28334 Bremen, Germany

<sup>6</sup>Fisheries and Ocean, Canada, Bedford Institute of Oceanography, PO Box 1006, Dartmouth, Nova Scotia, BY2 4A2 Canada

\*Corresponding author: rafael.goncalves.araujo@awi.de - rafaelgoncalvesaraujo@gmail.com

\*\*Corresponding author: cost@aqua.dtu.dk

**Table S1. Water masses classification.** Thermohaline ranges used to characterize the water masses in the Fram Strait and east Greenland <sup>22,34</sup>.

| <b>Water Mass</b>                             | <b>Temperature</b> | <b>Salinity</b> |
|-----------------------------------------------|--------------------|-----------------|
| <b>Atlantic Water (AW)</b>                    | > 3 °C             | > 34.9          |
| <b>Arctic Surface Water (ASW)</b>             | > 0 °C             | < 34.4          |
|                                               | > 2 °C             | < 34.9          |
| <b>Polar Water (PW)</b>                       | < 0 °C             | < 34.4          |
| <b>Upper Arctic Intermediate Water (uAIW)</b> | < 2 °C             | 34.4–34.9       |
| <b>Lower Arctic Intermediate Water (lAIW)</b> | 0–3 °C             | > 34.9          |
| <b>Norwegian Sea Deep Water (NSDW)</b>        | < 0 °C             | > 34.9          |

**Figure S1. Water fractionation.** (a) Phosphate ( $\mu\text{M}$ ) vs. nitrate ( $\mu\text{M}$ ) with the equations and source lines for the Atlantic and Pacific waters <sup>17</sup>. (b) Salinity vs.  $\delta^{18}\text{O}$  (‰) with the end members for Atlantic Water (AW), Meteoric Water (MW) and Sea-ice melt (SIM) and corresponding conservative mixing lines <sup>17</sup>.

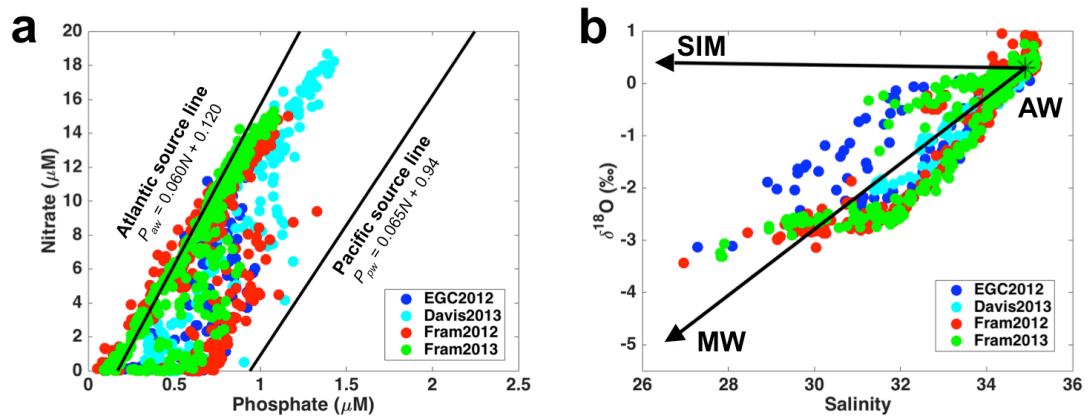

**Figure S2. Vertical distribution of Chlorophyll-a and UV-FDOM for the EGC2012 cruise.** Vertical distribution of (a) chlorophyll-a fluorescence (A.U.) and (b) C3 (R.U.) for the EGC2012 cruise, and (c) the correlation between chlorophyll-a fluorescence (A.U.) and C3 (R.U.).

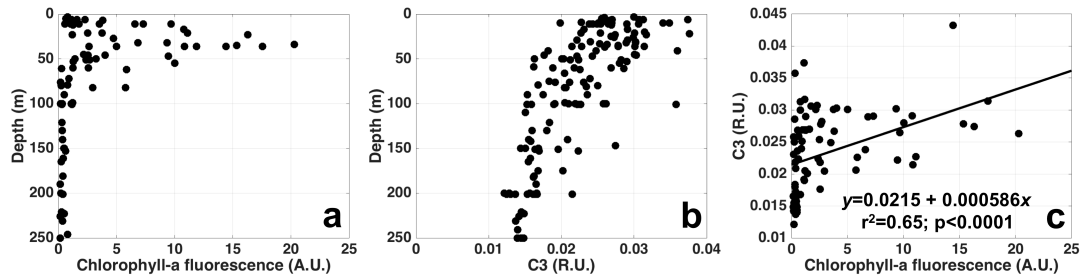

**Figure S3. Scatter plots each of the cruises performed in the eastern**

**Greenland, considering only PW and ASW (salinity<34.3). (top panel) C1 (R.U.)**

**vs.  $\delta^{18}\text{O}$  (‰) vs.  $f_{sim}$ . (middle panel) C1 (R.U.) vs.  $f_{mw}$  vs.  $f_{sim}$ . (bottom panel) C1**

**(R.U.) vs.  $f_{sim}$  vs. salinity.**

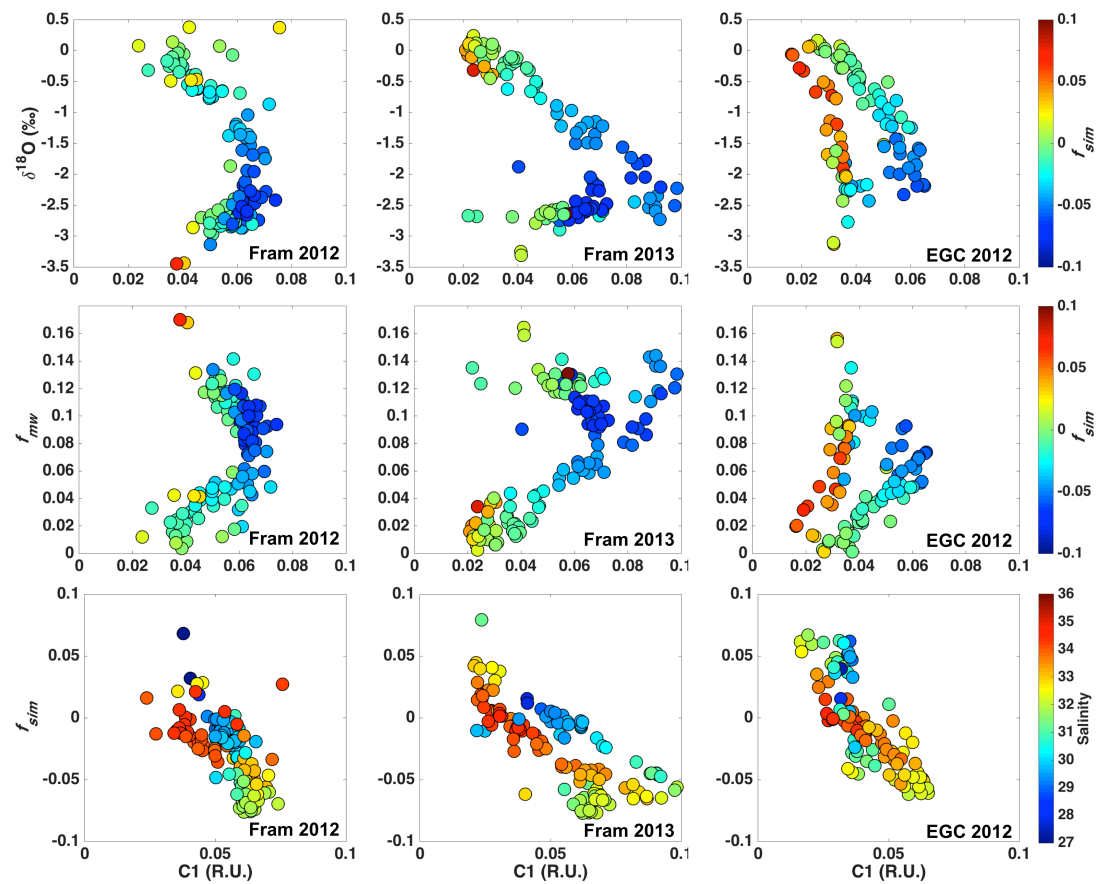

**Figure S4. Vertical distribution of UV-fluorescent C3 (R.U.) along the transects.** (a) Fram2012, (b) Fram2013 and (c) Davis2013. Note the differences in color bar ranges for the cruises. Produced with Ocean Data View <sup>60</sup>.

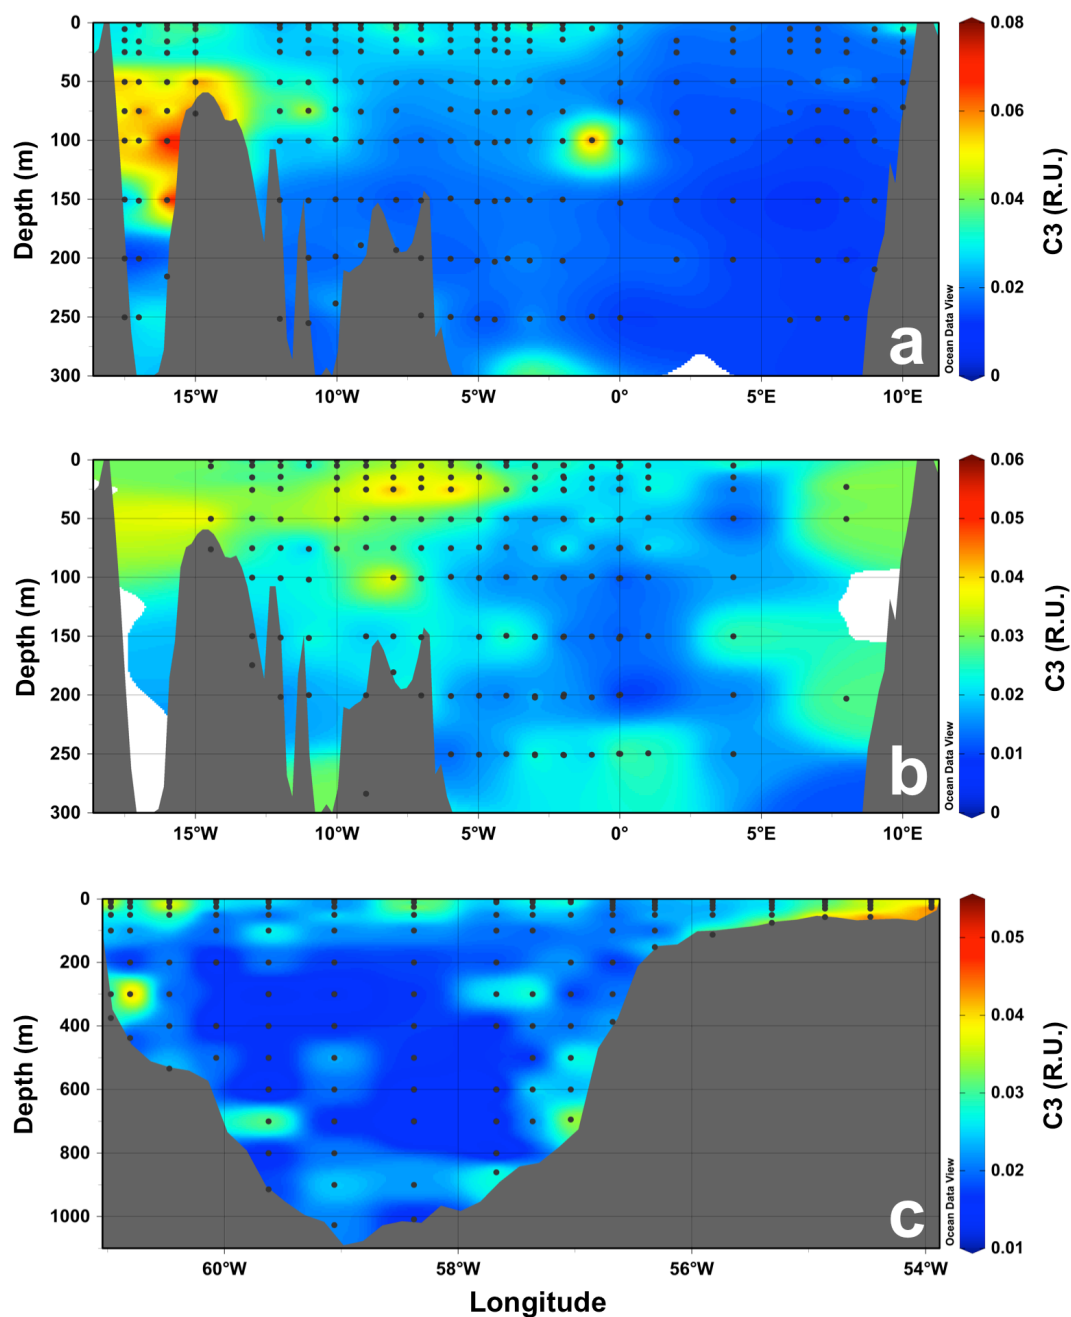

Supplement: srep33978-s1.pdf [file srep33978-s1.pdf]
